# Supplementary material
Source: MDPI journal article supplement (https://www.mdpi.com/2073-4441/15/3/530)
Supplement: s1 [file s1]

**Table S1.** Medium preparation compositions

| Solution                   | Compound                                                                           | Unit | Amount |
|----------------------------|------------------------------------------------------------------------------------|------|--------|
| <b>Cultivation medium</b>  |                                                                                    |      |        |
| A                          | K <sub>2</sub> HPO <sub>4</sub>                                                    | g    | 5.16   |
|                            | KH <sub>2</sub> PO <sub>4</sub>                                                    | g    | 1.50   |
|                            | NH <sub>4</sub> Cl                                                                 | g    | 0.30   |
|                            | Yeast extract                                                                      | g    | 0.30   |
|                            | Distilled water                                                                    | mL   | 690.00 |
| B                          | MgSO <sub>4</sub> ·7H <sub>2</sub> O                                               | g    | 0.10   |
|                            | Distilled water                                                                    | mL   | 50.00  |
| C                          | Na <sub>2</sub> S <sub>2</sub> O <sub>3</sub> ·5H <sub>2</sub> O                   | g    | 5.00   |
|                            | Distilled water                                                                    | mL   | 50.00  |
|                            | Na <sub>2</sub> -EDTA                                                              | g/L  | 50.00  |
|                            | ZnSO <sub>4</sub> ·7H <sub>2</sub> O                                               | g/L  | 22.0   |
| Trace metal                | CaCl <sub>2</sub>                                                                  | g/L  | 5.54   |
|                            | MnCl <sub>2</sub> ·4H <sub>2</sub> O                                               | g/L  | 5.06   |
|                            | FeSO <sub>4</sub> ·7H <sub>2</sub> O                                               | g/L  | 4.99   |
|                            | (NH <sub>4</sub> ) <sub>6</sub> Mo <sub>7</sub> O <sub>24</sub> ·4H <sub>2</sub> O | g/L  | 1.10   |
|                            | CuSO <sub>4</sub> ·5H <sub>2</sub> O                                               | g/L  | 1.57   |
|                            | CoCl <sub>2</sub> ·6H <sub>2</sub> O                                               | g/L  | 1.61   |
| <b>Fermentation Medium</b> |                                                                                    |      |        |
| A                          | MgCl <sub>2</sub> ·6H <sub>2</sub> O                                               | g    | 0.083  |
|                            | NaHCO <sub>3</sub>                                                                 | g    | 0.12   |
|                            | NH <sub>4</sub> Cl                                                                 | g    | 0.30   |
|                            | Yeast extract                                                                      | g    | 0.30   |
|                            | CaCl <sub>2</sub> (for immobilized cell experiment)                                | g    | 2.22   |
|                            | Distilled water                                                                    | mL   | 200.00 |
| B                          | K <sub>2</sub> HPO <sub>4</sub>                                                    | g    | 1.36   |
|                            | KH <sub>2</sub> PO <sub>4</sub>                                                    | g    | 1.70   |
|                            | Distilled water                                                                    | mL   | 360.00 |
| C                          | FeSO <sub>4</sub> ·7H <sub>2</sub> O                                               | g    | 0.05   |
|                            | Distilled water                                                                    | mL   | 50.00  |
| D                          | Na <sub>2</sub> SO <sub>4</sub>                                                    | g    | 0.09   |
|                            | Distilled water                                                                    | mL   | 50.00  |
| E                          | Na <sub>2</sub> S·9H <sub>2</sub> O                                                | g    | 0.891  |
|                            | Distilled water                                                                    | mL   | 130.00 |
| Trace metal                | Cultivation medium trace metal                                                     | mg/L | 5.00   |

**Table S2.** Solution C composition for acclimatization medium.

| Source of S                                                      | Units | Acclimatization Level |      |      |      |
|------------------------------------------------------------------|-------|-----------------------|------|------|------|
|                                                                  |       | I                     | II   | III  | IV   |
| Na <sub>2</sub> S <sub>2</sub> O <sub>3</sub> .5H <sub>2</sub> O | g     | 3.75                  | 2.5  | 1.25 | 0    |
| Na <sub>2</sub> S.9H <sub>2</sub> O                              | g     | 0.18                  | 0.35 | 0.52 | 0.7  |
| Working Volume                                                   | mL    | 200                   | 200  | 200  | 1000 |
